# Supplementary material
Source: Springer Nature journal article supplement (https://www.springermedizin.de/resource/supplementary/13058_2011_2917_MOESM2_ESM.pdf/9702892)
Supplement: MOESM2 [file 9702892]

**CTC**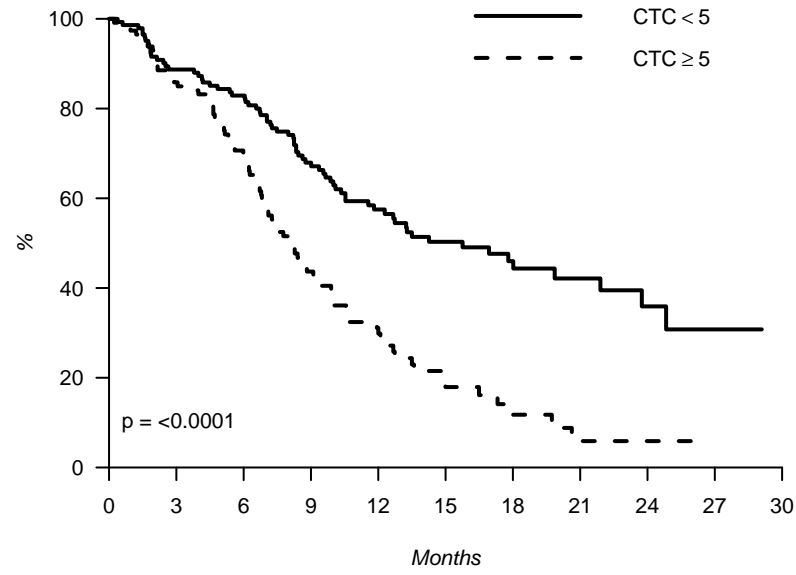**Number at risk**

|     |     |     |     |    |    |    |    |    |    |   |   |
|-----|-----|-----|-----|----|----|----|----|----|----|---|---|
| —   | 143 | 124 | 114 | 84 | 59 | 44 | 28 | 16 | 10 | 4 | 0 |
| - - | 114 | 96  | 77  | 42 | 24 | 10 | 5  | 2  | 2  | 0 | 0 |

**CEA**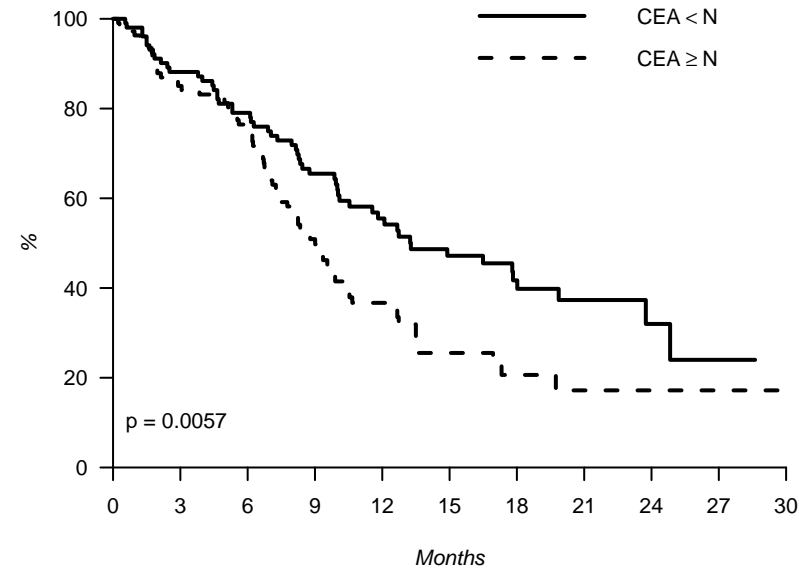**Number at risk**

|     |     |    |    |    |    |    |    |    |   |   |   |
|-----|-----|----|----|----|----|----|----|----|---|---|---|
| —   | 102 | 88 | 77 | 60 | 41 | 32 | 22 | 11 | 6 | 2 | 0 |
| - - | 108 | 90 | 79 | 44 | 25 | 12 | 7  | 5  | 5 | 3 | 1 |

**LDH**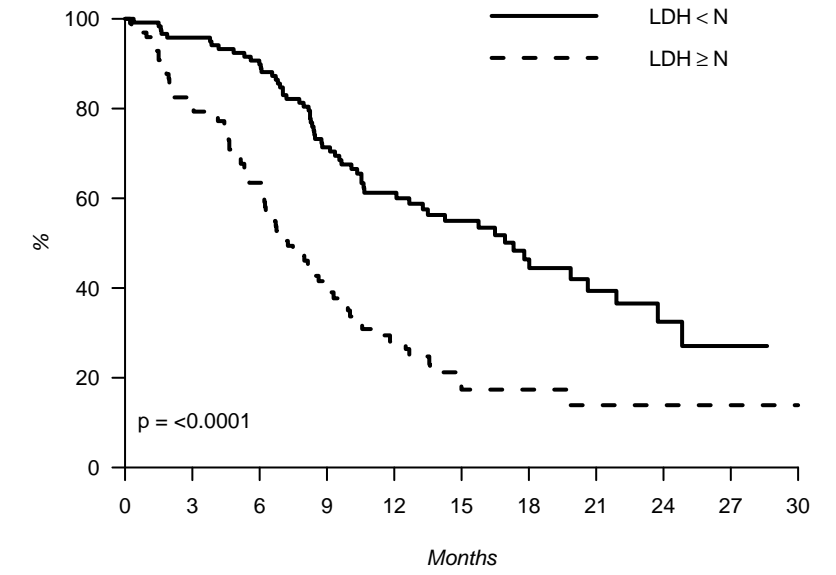**Number at risk**

|     |     |     |     |    |    |    |    |    |   |   |   |
|-----|-----|-----|-----|----|----|----|----|----|---|---|---|
| —   | 120 | 114 | 105 | 77 | 51 | 39 | 24 | 14 | 8 | 2 | 0 |
| - - | 98  | 76  | 59  | 32 | 19 | 9  | 6  | 4  | 4 | 2 | 1 |

**CA15-3**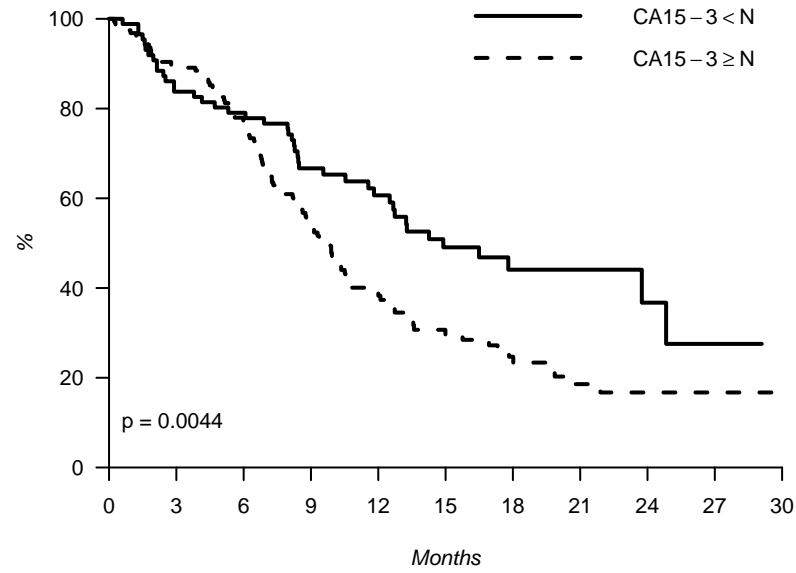**Number at risk**

|     |     |     |     |    |    |    |    |    |   |   |   |
|-----|-----|-----|-----|----|----|----|----|----|---|---|---|
| —   | 87  | 72  | 66  | 51 | 38 | 27 | 16 | 9  | 5 | 2 | 0 |
| - - | 157 | 138 | 118 | 74 | 44 | 27 | 19 | 10 | 8 | 4 | 1 |

**CYFRA21-1**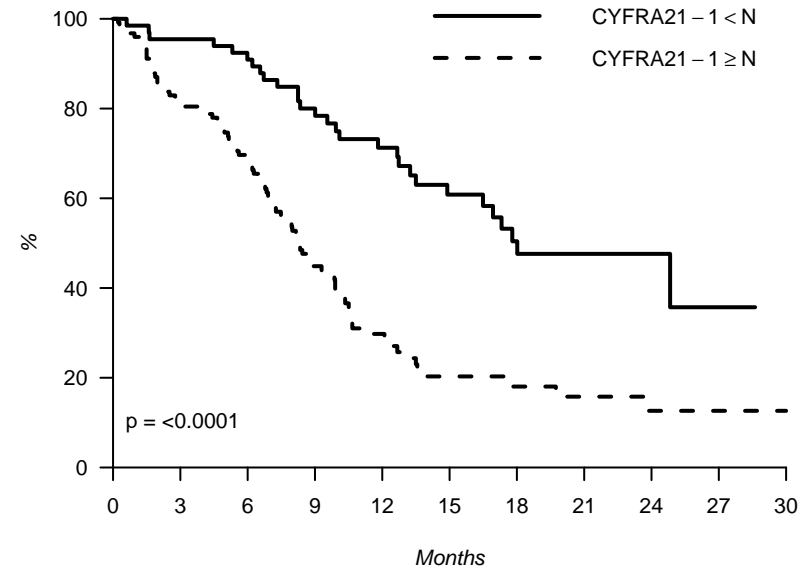**Number at risk**

|     |     |    |    |    |    |    |    |   |   |   |   |
|-----|-----|----|----|----|----|----|----|---|---|---|---|
| —   | 66  | 63 | 60 | 49 | 36 | 27 | 18 | 9 | 6 | 3 | 0 |
| - - | 124 | 98 | 83 | 47 | 23 | 14 | 8  | 6 | 4 | 1 | 1 |

**ALP**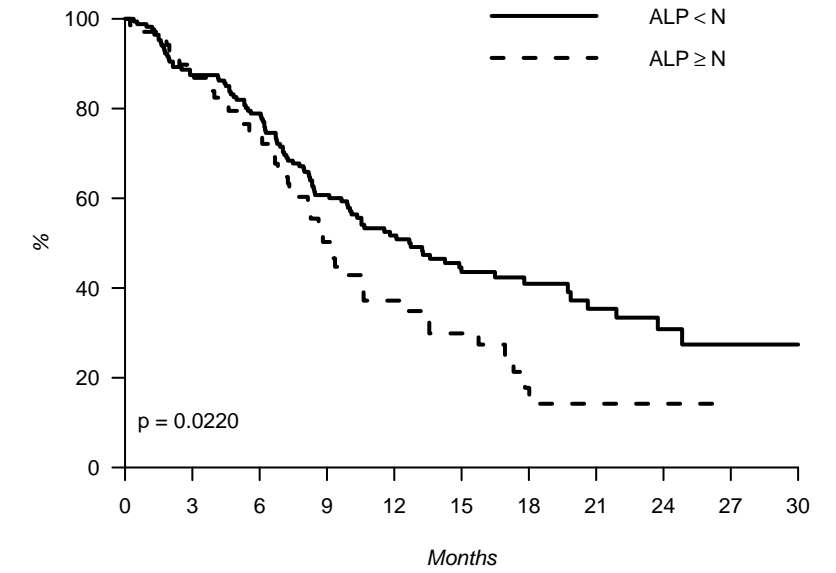**Number at risk**

|     |     |     |     |    |    |    |    |    |    |   |   |
|-----|-----|-----|-----|----|----|----|----|----|----|---|---|
| —   | 169 | 145 | 128 | 89 | 61 | 43 | 29 | 18 | 12 | 6 | 1 |
| - - | 69  | 60  | 50  | 29 | 18 | 12 | 5  | 2  | 2  | 0 | 0 |
